# Supplementary material for: Effect of Oxidative Modification by Peroxyl Radical on the Characterization and Identification of Oxidative Aggregates and In Vitro Digestion Products of Walnut (Juglans regia L.) Protein Isolates
Source: MDPI journal article supplement (doi:10.3390/foods11244104), 2022-12-19
Supplement: s1 [file s1]

Document S1: A peptide sequence summary of the top 10 proteins identified.

G-O (Gastric-Native)

**XP\_018812171.1 vicilin Car i 2.0101** [312-321] [417-433] [469-485] [511-533] [635-647] [710-722] [749-768]  
DRQDPQQQYHRCQRRCQIQEQSPERQRCQQRCE  
RQYKEQQGRERGPEASPRRESRGREEEQQRHNPY  
YFHSQSIRSHESEEEGEVKYLERFTEPELLRGIEN  
YRVVILDANPNTFMLPHHKDAESVAVVTRGRATLT  
LVSQETRESFNLECGDVIRVPAGATVYVINQDSNER  
LEMVKLLQPVNNPGQFREYYAAGAKSPDQSYLRV  
FSNDILVAALNTPRDRLERFFDQQEQREGVVIASQ  
EKLRLALSQHAMSAGQRPWGRSSGGPISLKSERPS  
YSNQFGQFFEACPEEHRQLQEMDVLVNYAEIKRG  
AMMVPHYNSKATVVVYVVEGTGRYEMACPHVSS  
QSYEGQGRREQEEEEESTGRFQKV TARLARGDIFVI  
PAGHPIAITASQNNENLRLLGFGINGENNQRNFLAG  
QNNIINQLEREAKELSFNMPREEEEEIFESQMESYF  
VPTERQS

**XP\_035546314.1 vicilin-like seed storage protein At2g28490** [50-70] [193-203]  
EERKEREQRRSEREEGEEETDDRFLQDSKSVMRT  
EAGEMRVIKSLGGKIWDRPLHIGFITMEPQTLFIPQ  
YLDSSLMIFIRRGAEAKIGLIYKDELGERRLKTGDLY  
RIPAGSAFYLVNTAEGQRLHIICSIDPSELGIGTFQS  
FFIGGGKYPTSVLAGFERETLSNAF

**XP\_018827328.1 11S globulin-like** [43-51] [115-127] [178-217] [286-299] [332-364] [435-459] [465-479]  
KRLVALEPSNRIEAEAGVIESWDPNNQQFQCAGVA  
VVRRTIEPNGLLLPQYSNAPQLLYIVKGRGITGVLF  
PGCPETFEESQQGQSRIRPSLRASFQRDRHQKIRH  
FREGDVIAFPAGVAHWCYNDGTPVVTVALMDTT  
NNANQLDQNPRNFYLAGNPDDEFREQEQQEYEQ  
HRRQQQHQQRHGEPGQQQRGSSNNVFSGFDAEFL  
ADAFNVDTETARRLQSNHDQRRGIVRVEGNLQVI  
RPRWSREEQELEDRRERQRELEWERERRQSRRTG  
GRFDNGLEETVCTLRRLRENIGDPSRADIYTEQAGRI  
STVNSQNLPIRLWLQLSAERGALYSDALYVPHWN  
LNAHSVVYAIRGRAEIQVVDHLGQTVFDDDLREG  
QLLTIPQNFVVKRATGEGFEWVSFKTNENAMISP  
LAGRTSAIRAIPEEVLANAFQIPRE

**XP\_018827329.1 11S globulin seed storage protein Jug r 4** [273-280] [346-358] [431-453]  
GRQLQVIRPRWSREEQEREERKERERERESERR  
QSRRGGRDDNGLEETICTLRLRENIGDPSRADIYTE  
EAGRISTVNSHTLPVLRWLQLSAERGALYSDALYV  
PHWNLNAHSVVYALRGRAEVQVVDNFGQTVFDD  
ELREGQLLTIPQNFVVKRARNEGFEWVSFKTNEN  
AMVSPLAGRTSAIRAL

G-5 (Gastric-Oxidation)

**XP\_018812171.1 vicilin Car i 2.0101** [311-321] [327-335] [375-401] [417-443] [446-456] [469-502] [519-533] [539-546] [608-634] [655-665] [687-737]  
DRQDPQQQYHRCQRRCQIQEQSPERQRCQQRCE  
RQYKEQQGRERGPEASPRRESRGREEEQQRHNPY  
YFHSQSIRSHESEEEGEVKYLERFTEPELLRGIEN  
YRVVILDANPNTFMLPHHKDAESVAVVTRGRATLT  
LVSQETRESFNLECGDVIRVPAGATVYVINQDSNER  
LEMVKLLQPVNNPGQFREYYAAGAKSPDQSYLRV  
FSNDILVAALNTPRDRLERFFDQQEQREGVVIASQ  
EKLRLALSQHAMSAGQRPWGRSSGGPISLKSERPS  
YSNQFGQFFEACPEEHRQLQEMDVLVNYAEIKRG  
AMMVPHYNSKATVVVYVVEGTGRYEMACPHVSS  
QSYEGQGRREQEEEEESTGRFQKV TARLARGDIFVI  
PAGHPIAITASQNNENLRLLGFGINGENNQRNFLAG  
QNNIINQLEREAK

**XP\_035546314.1 vicilin-like seed storage protein At2g28490** [128-139] [149-165] [226-239] [392-402] [413-441]  
IRRGEAKIGLIYKDELGERRLKTGDLYRIPAGSAFY  
LVNTAEGQRLHIICSIDPSELGIGTFQSFFIGGGKY  
PTSVLAGFERETLSNAFNVSFSEVQDILSRQREGPI  
VYVPESHSPSVWSKFLQMKERDRLQHLKKLVDFH  
EPRDDDEEEEEQQQITWSWRKLLNSVLGKEPS  
KRGDKRTRRTPDSYNLYKRRPDRNNYGWSVALD  
ESDYTPLKHSGISVFLVNLTAGSMMAHPVNPTATE  
YGIVLSGSGTIQIVYPNGTSAMNAKISEGDVFWVP  
KYFPFCQIASRTGPLEFFGFTTSARTNRPQFLVGAS  
SILRTMLGPELAA  
**XP\_018827328.1 11S globulin-like** [42-51] [79-105] [115-127] [170-217] [247-260] [270-299] [332-459] [464-481] [487-496]  
KRLVALEPSNRIEAEAGVIESWDPNNQQFQCAGVA  
VVRRTIEPNGLLLPQYSNAPQLLYIVKGRGITGVLF  
PGCPETFEESQQGQSRIRPSLRASFQRDRHQKIRH  
FREGDVIAFPAGVAHWCYNDGTPVVTVALMDTT  
NNANQLDQNPRNFYLAGNPDDEFREQEQQEYEQ  
HRRQQQHQQRHGEPGQQQRGSSNNVFSGFDAEFL  
ADAFNVDTETARRLQSNHDQRRGIVRVEGNLQVI  
RPRWSREEQELEDRRERQRELEWERERRQSRRTG  
GRFDNGLEETVCTLRRLRENIGDPSRADIYTEQAGRI  
STVNSQNLPIRLWLQLSAERGALYSDALYVPHWN  
LNAHSVVYAIRGRAEIQVVDHLGQTVFDDDLREG  
QLLTIPQNFVVKRATGEGFEWVSFKTNENAMISP  
LAGRTSAIRAIPEEVLANAFQIPRED  
ARRLKFSRQETFLARSRSRSTDIRRVVE

**XP\_018827329.1 11S globulin seed storage protein Jug r 4** [41-49] [77-100] [113-135] [174-211] [239-254] [273-280] [326-453] [458-473] [479-490]  
MAKPILLSIYFLIVALFNGCLAQSGGRQQQQFGQ  
CQLNRRLDALEPTNRIEAEAGVIESWDPNNQQFQC  
AGVAVVRRTIEPNGLLLPQYSNAPQLVYIARGGIT  
GVLFPGCPTFEESQRQSQQGQSREFQODRHQKIR  
HFREGDIIAFPAGVAHWSYNDGSNPVVAISLLDTN  
NNANQLDQNPRNFYLAGNPDDEFRPQGQQQEYEQ  
HRRQQQRQQRPGEHGQQQRGLGNNVFSGFDAF  
LADAFNVDTETARRLQSENDHRRSIVRVEGRQLQ  
VIRPRWSREEQEREERKERERERESERRQSRRG  
GRDDNGLEETICTLRLRENIGDPSRADIYTEEAGRI  
STVNSHTLPVLRWLQLSAERGALYSDALYVPHWN  
LNAHSVVYALRGRAEVQVVDNFGQTVFDDELRE  
GQLLTIPQNFVVKRARNEGFEWVSFKTNENAMV  
SPLAGRTSAIRALPEEVLATAFQIPREDARRLKFN  
QESTLVRSRPSRSRSSRSERRAEV

I-5 (Intestinal-Oxidation)

**XP\_018812171.1 vicilin Car i 2.0101**[124-131] [375-386] [469-502] [511-533] [539-546] [624-634] [655-665] [687-737]  
CERQFQEQEERQRCQQRRCERQYKEQQGRERGPE  
ASPRRESRGREEEQQRHNPYYFHSQSIRSRHESEE  
GEVKYLERFTEPELLRGIENYRVVILDANPNTFM  
LPHHKDAESVAVVTRGRATLTLSQETRESFNLEC  
GDVIRVPAGATVYVINQDSNERLEMVKLLQPVNN  
PGQFREYYAAGAKSPDQSYLRVFSNDILVAALNTP  
RDRLERFFDQQEQREGVVIASQEKLRALSQHAMS  
AGQRPWGRSSGGPISLKSERPSYSNQFGQFFEAC  
PEEHRQLQEMDVLVNYAEIKRGAMMVPHYNSKA  
TVVVYVVEGTGRYEMACPHVSSQSYEGQGRREQ  
EEEEESTGRFQKV TARLARGDIFVIPAGHPIAITASQN  
ENLRLLGFGINGENNQRNFLAGQNNIINQLEREAK

**XP\_035546314.1 vicilin-like seed storage protein At2g28490** [50-70] [128-139] [149-165] [413-441]  
RSEREEGEEETDDRFLQDSKSVMRTEAGEMRVIK  
SLGGKIWDRPLHIGFITMEPQTLFIPQYLDSSLMIFI  
RRGEAKIGLIYKDELGERRLKTGDLYRIPAGSAFY  
LVNTAEGQRLHIICSIDPSELGIGTFQSFFIGGGKY  
TSVLGFERETLSNAFNVSFSEVQDILSRQREGPIV  
YVPESHSPSVWSKFLQMKERDRLQHLKKLVDFHE  
PRDDDEEEEEQQQITWSWRKLLNSVLGKEPSK  
RGDKRTRRTPDSYNLYKRRPDRNNYGWSVALDE  
SDYTPLKHSGISVFLVNLTAGSMMAHPVNPTATEY  
GIVLSGSGTIQIVYPNGTSAMNAKISEGDVFWVPK  
YFPFCQIASRTGPLEFFGFTTSARTNRPQFLVGASSI  
LRTMLGPELAA  
**XP\_018827328.1 11S globulin-like** [42-51] [80-105] [115-127] [179-216] [234-261] [270-299] [332-378] [398-459] [464-484] [487-496]  
KRLVALEPSNRIEAEAGVIESWDPNNQQFQCAGVA  
VVRRTIEPNGLLLPQYSNAPQLLYIVKGRGITGVLF  
PGCPETFEESQQGQSRIRPSLRASFQRDRHQKIRH  
FREGDVIAFPAGVAHWCYNDGTPVVTVALMDTT  
NNANQLDQNPRNFYLAGNPDDEFREQEQQEYEQ  
HRRQQQHQQRHGEPGQQQRGSSNNVFSGFDAEFL  
ADAFNVDTETARRLQSNHDQRRGIVRVEGNLQVI  
RPRWSREEQELEDRRERQRELEWERERRQSRRTG  
GRFDNGLEETVCTLRRLRENIGDPSRADIYTEQAGRI  
STVNSQNLPIRLWLQLSAERGALYSDALYVPHWN  
LNAHSVVYAIRGRAEIQVVDHLGQTVFDDDLREG  
QLLTIPQNFVVKRATGEGFEWVSFKTNENAMISP  
LAGRTSAIRAIPEEVLANAFQIPREDARRLKFSRQET  
FLARSRSR

**XP\_018827329.1 11S globulin seed storage protein Jug r 4** [40-49] [77-100] [113-135] [174-211] [239-254] [281-291] [326-427] [429-473] [479-490]  
QQFGQCQLNRRLDALEPTNRIEAEAGVIESWDPNN  
QQFQCAGVAVVRRTIEPNGLLLPQYSNAPQLVYIA  
RGRGITGVLFPGCPETFEESQRQSQQGQSREFQOD  
RHQKIRHFREGDIIAFPAGVAHWSYNDGSNPVVAIS  
LLDTNNNNANQLDQNPRNFYLAGNPDDEFRPQGQ  
QEYEQHRRQQQRQQRPGEHGQQQRGLGNNVFSG  
FDADFLADAFNVDTETARRLQSENDHRRSIVRVEG  
RQLQVIRPRWSREEQEREERKERERERESERRQ  
SRRGGRDDNGLEETICTLRLRENIGDPSRADIYTEE  
AGRISTVNSHTLPVLRWLQLSAERGALYSDALYVP  
HWNLNAHSVVYALRGRAEVQVVDNFGQTVFDDE  
LREGQLLTIPQNFVVKRARNEGFEWVSFKTNENA  
MVSPLAGRTSAIRALPEEVLATAFQIPREDARRLK  
NRQESTLVRSRPSRSRSSR

**XP\_018814692.1 Vicilin Jug r 6.0101** [93-111] [308-317] [407-427] [452-463]

Document S1: A peptide sequence summary of the top 10 proteins identified.

LGGEREEENPYVFEDEDFETRVRTDEGRIQVLEKF  
TKRSKLLRGIENFRVAILEANPQTFISPAHFDAELVV  
FVAKGRATITTVREEKRENFNVEQGDIMRIPAGTPV  
YLINRDENEKLYIVKILRPVSVPGHF EAFHGSGGED  
PESFYRAFSWEVLEAALKTRRDQLEKLF GKQTQG  
VVIKASKEQIRSMKHEETTPRIWPFGGDSTHPFNL  
FHKRPSQSNQFGRLFETDPKECKQLQDL DLMVSFA  
NITKGSMAGPYYN SRATKISVVIEGEGYFEMACPH  
LSSSGSRGQREGSGSSRRRSRSGPSYQQIRGR LRPG  
MVFVAPAGHPVAVIASRNKNLQVLCFDVNAQGNI  
RFPLAGKNNIVNEFEKEAKELAFNFP

**XP\_018842296.1 legumin B-like** [45-69] [89-101] [179-195] [197-211] [274-284] [361-380] [385-429] [448-459] [473-487]  
TECRINNLNAQEPGRRVESEAGLSEYWNRNDEQF  
RCAGVDLVRHTIQRRGLLLPSFSNAPRLVYVVQGR  
GLHGAAIPGCPETFQSESSSQFRGEQGSQRLSRDQ  
HQKVREIREGDVVAIPAGVAHWIYNDGESQLIVMI  
LYDTSNQANQLDENARRFYLAGNPHQQQQGGRQ  
RRRESWPGRSRSRSSQSPEERERSQQSGSNIFSGFD  
EEFLADSFNIDNELAMRIQNRDDQRGIIVTVEDEL  
VLSPQSRGEEREERGLDRDNGVEETFCTLR LKHNI  
ADAQRADVYNERGGRITSLNSFNPILRYIQLSAER  
GVLYRNALVAPHYNLNSHSVYIVIRGNARLQVVG  
ENGQNVFDGEIREGQALTVPQNFAVIKKAGNQGFE  
WVAFKTNDNAKINALAGRLSTMRALPEDVLINAY  
RIDREEARRLKYNRDETTLFSSDSSGSPRRRD

**XP\_018818401.1 11S globulin seed storage protein 2-like** [111-124] [182-195] [284-297] [313-326] [398-425] [433-459] [469-479]  
AETYESETSQDLSRRRSSQMGQLQGGGDQQRSRR  
ADQHQKVNRIIRRGDIVAIPAGVAHWSYNDGNEEL  
VAFVIDLSNHANQLDRRFRSFLAGGEPRDQSG  
QGGSRQEERQEQRQRSRREQRGSFQNFSGFSEE  
LLAEAYNIPDTIARRLQEDDNRRGVIVKQCDEMRR  
MMRPDEDEQEGQRQLVNGLEETLCTTRIRHNLD  
QTESDVFSRQAGRVNIVNQHKLPILRYLDMSAEKG  
HLFPNALYTPHWSMTDNRVVYVLRGDARVQIVDD  
NGDNVFDERVKRGDVYVIPQFYATTARAGNNGFE  
YVTIKTSGQPMKSPMAGYTSVIRAMPIDVLTNSFQ  
MSPREAQNLKHNRRGHQSFLSSSRSS

**XP\_018827137.1 11S globulin seed storage protein 2-like** [369-383] [457-467]  
YVLRGEARVQIVDDNGNNVFDERVKRGDVFVIPQ  
FFAVTSKAGNDGF EYVTIKTSGQPMKSPMAGYTS  
VIKAMPIDVLANAYQMSLRDAQNLKNSRGHQSF  
LSSSRAS

**XP\_018824007.1 2S sulfur-rich seed storage protein 2** [106-126]  
RQVVRQQQQQGLRGEEMEEMVQSARDLPN  
**XP\_018837699.1 oleosin 18.2 k Da-like** [113-123] [125-140]  
RRTRVPEQLEHAKRRAHEAAGQMGTVTGK  
**XP\_018814692.1 Vicilin Jug r 6.0101** [96-111] [169-254] [309-317] [396-404] [407-427] [464-472] [480-492]

LGGEREEENPYVFEDEDFETRVRTDEGRIQVLEKF  
TKRSKLLRGIENFRVAILEANPQTFISPAHFDAELVV  
FVAKGRATITTVREEKRENFNVEQGDIMRIPAGTPV  
YLINRDENEKLYIVKILRPVSVPGHF EAFHGSGGED  
PESFYRAFSWEVLEAALKTRRDQLEKLF GKQTQG  
VVIKASKEQIRSMKHEETTPRIWPFGGDSTHPFNL  
FHKRPSQSNQFGRLFETDPKECKQLQDL DLMVSFA  
NITKGSMAGPYYN SRATKISVVIEGEGYFEMACPH  
LSSSGSRGQREGSGSSRRRSRSGPSYQQIRGR LRPG  
MVFVAPAGHPVAVIASRNKNLQVLCFDVNAQGNI  
RFPLAGKNNIVNEFEKEAKELAFNFPAR EVEKIFRN  
QDQEFFFPGPSRQPEEGGRA

**XP\_018842296.1 legumin B-like** [23-33] [44-75] [89-139] [179-211] [274-284] [305-381] [385-459] [467-487]  
LAQLEQVTGQSQRQQQQRFTQTECRINNLNAQEPG  
RRVESEAGLSEYWNRNDEQFRCAGVDLVRHTIQ  
RGLLLPSFSNAPRLVYVVQGRGLHGAAIPGCPETF  
QSESSSQFRGEQGSQR LSRDQHQKVREIREGDVVA  
IPAGVAHWIYNDGESQLIVMILYDTSNQANQLDEN  
ARRFYLAGNPHQQQQGGRQRRRESWPGRSRSRSS  
QSPEERERSQQSGSNIFSGFDEEFLADSFNIDNELA  
MRIQNRDDQRGIIVTVEDELRLVSPQSRGEEREER  
GLDRDN GVEETFCTLR LKHNIADAQRADVYNERG  
GRITSLNSFNPILRYIQLSAERGVLRYRNALVAPHY  
NLNSHSVYIVIRGNARLQVVGENGQNVFDGEIREG  
QALTVPQNFAVIKKAGNQGFEWVAFKTNDNAKIN  
ALAGRLSTMRALPEDVLINAYRIDREEARRLKYNR  
DETTLFSSDSSGSPRRRD

**XP\_018818401.1 11S globulin seed storage protein 2-like** [111-141] [156-173] [182-196] [199-208] [311-481]  
GLLGLTYPGCAETYESETSQDLSRRRSSQMGQLQGG  
DQQR SRRADQHQKVNRIIRRGDIVAIPAGVAHW  
SYNDGNEELVAFVIDLSNHANQLDRRFRSFLAG  
GEPRDGQSGQGGSRQEERQEQRQRSRREQRGSF  
QNIFSGFSEELLAEAYNIPDTIARRLQEDDNRRGVI  
VKQCDEMRRMMRPDEDEQEGQRQLVNGLEETLC  
TTRIRHNLDTQTESDVFSRQAGRVNIVNQHKLPIL  
YLDMSAEKGHLFPNALYTPHWSMTDNRVVYVLR  
GDARVQIVDDNGDNVFDERVKRGDVYVIPQFYAT  
TARAGNNGFEYVTIKTSGQPMKSPMAGYTSVIRA  
MPIDVLTNSFQMSPREAQNLKHNRRGHQSFLSSSR  
SS

**XP\_018827137.1 11S globulin seed storage protein 2-like** [195-204] [299-314] [319-326] [332-339] [348-467]  
DRRFRSFLAGGEPRQEHMEGDRERTRQRRSRQQ  
RVGFQSLFSGFSEELLAEAYNIPVNIARRLQEDDSQ  
RGHIVRCQEEMRRMIRPDEDRQEGQRWLNLEET  
VCTTRIRHNLDTQSESDFVSRQGGRVNIVNMHKL  
PILR FMDMSAEKGHLFPNAMYTPHWSMTDNRVVY  
VLRGEARVQIVDDNGNNVFDERVKRGDVFVIPQF  
FAVTSKAGNDGF EYVTIKTSGQPMKSPMAGYTSVI  
KAMPIDVLANAYQMSLRDAQNLKNSRGHQSFLLS  
SSRSAS

**XP\_018824007.1 2S sulfur-rich seed storage protein 2** [106-126]  
RQVVRQQQQQGLRGEEMEEMVQSARDLPN  
**XP\_018837699.1 oleosin 18.2 k Da-like** [101-112]  
RRTRVPEQLEHAKRRAHEAA  
**XP\_018814692.1 Vicilin Jug r 6.0101** [169-252] [265-272] [308-317] [344-354] [407-427] [452-460] [464-472] [480-492]  
VVFVAKGRATITTVREEKRENFNVEQGDIMRIPAG  
TPVYLINRDENEKLYIVKILRPVSVPGHF EAFHGSG  
GEDPESFYRAFSWEVLEAALKTRRDQLEKLF GKQ  
TQGVIIKASKEQIRSMKHEETTPRIWPFGGDSTHP

FNLFHKRPSQSNQFGRLFETDPKECKQLQDL DLM  
VSFANITKGSMAGPYYN SRATKISVVIEGEGYFEM  
ACPHLSSSGSRGQREGSGSSRRRSRSGPSYQQIRGR  
LRPGMVFVAPAGHPVAVIASRNKNLQVLCFDVNA  
QGNIRFPLAGKNNIVNEFEKEAKELAFNFPAR E  
VEKIFRNQDQEFFFPGPSRQPEEGGRA

**XP\_018842296.1 legumin B-like**  
[23-33] [44-75] [89-133] [179-211] [274-291] [303-331]  
[335-347] [356-417] [430-487]

CLAQLEQVTGQSQRQQQQRFTQTECRINNLNAQEP  
GRRVESEAGLSEYWNRNDEQFRCAGVDLVRHTIQ  
RRGLLLPSFSNAPRLVYVVQGRGLHGAAIPGCPET  
FQSESSSQFRGEQGSQRLSRDQHQKVREIREGDV  
VAIPAGVAHWIYNDGESQLIVMILYDTSNQANQLDE  
NARRFYLAGNPHQQQQGGRQRRRESWPGRSRSRSS  
SQSPEERERSQQSGSNIFSGFDEEFLADSFNIDNEL  
AMRIQNRDDQRGIIVTVEDELRLVSPQSRGEERE  
EERGLDRDNGVEETFCTLR LKHNIADAQRADVYNER  
GGRITSLNSFNPILRYIQLSAERGVLRYRNALVAPH  
YNLNSHSVYIVIRGNARLQVVGENGQNVFDGEIRE  
GQALTVPQNFAVIKKAGNQGFEWVAFKTNDNAKI  
NALAGRLSTMRALPEDVLINAYRIDREEARRLKYN  
RDETTLFSSDSSGSPRRRD

**XP\_018818401.1 11S globulin seed storage protein 2-like** [111-124] [127-141] [156-196] [199-218] [284-297] [311-376] [381-481]  
AETYESETSQDLSRRRSSQMGQLQGGGDQQRSRR  
ADQHQKVNRIIRRGDIVAIPAGVAHWSYNDGNEEL  
VAFVIDLSNHANQLDRRFRSFLAGGEPRDQSG  
QGGSRQEERQEQRQRSRREQRGSFQNFSGFSEE  
LLAEAYNIPDTIARRLQEDDNRRGVIVKQCDEMRR  
MMRPDEDEQEGQRQLVNGLEETLCTTRIRHNLD  
QTESDVFSRQAGRVNIVNQHKLPILRYLDMSAEKG  
HLFPNALYTPHWSMTDNRVVYVLRGDARVQIVDD  
NGDNVFDERVKRGDVYVIPQFYATTARAGNNGFE  
YVTIKTSGQPMKSPMAGYTSVIRAMPIDVLTNSFQ  
MSPREAQNLKHNRRGHQSFLSSSRSS

**XP\_018827137.1 11S globulin seed storage protein 2-like** [195-204] [299-314] [319-326] [340-358] [369-447]  
RRFRSFLAGGEPRQEHMEGDRERTRQRRSRQQR  
VGFQSLFSGFSEELLAEAYNIPVNIARRLQEDDSQR  
GIIVRCQEEMRRMIRPDEDRQEGQRWLNLEETV  
CTTRIRHNLDTQSESDFVSRQGGRVNIVNMHKL  
PILRFMDMSAEKGHLFPNAMYTPHWSMTDNRVVY  
VLRGEARVQIVDDNGNNVFDERVKRGDVFVIPQF  
FAVTSKAGNDGF EYVTIKTSGQPMKSPMAGYTSVI  
KAMPIDVLANAYQMSLRDAQ

**XP\_018824007.1 2S sulfur-rich seed storage protein 2** [106-126]  
RQVVRQQQQQGLRGEEMEEMVQSARDLPN  
**XP\_018837699.1 oleosin 18.2 k Da-like** [113-123] [126-140]  
RRTRVPEQLEHAKRRAHEAAGQMGTVTGK
